# Supplementary material for: DNA barcoding unveils a high diversity of caddisflies (Trichoptera) in the Mount Halimun Salak National Park (West Java; Indonesia)
Source: PeerJ journal article supplement (doi:10.7717/peerj.14182), 2022-12-12

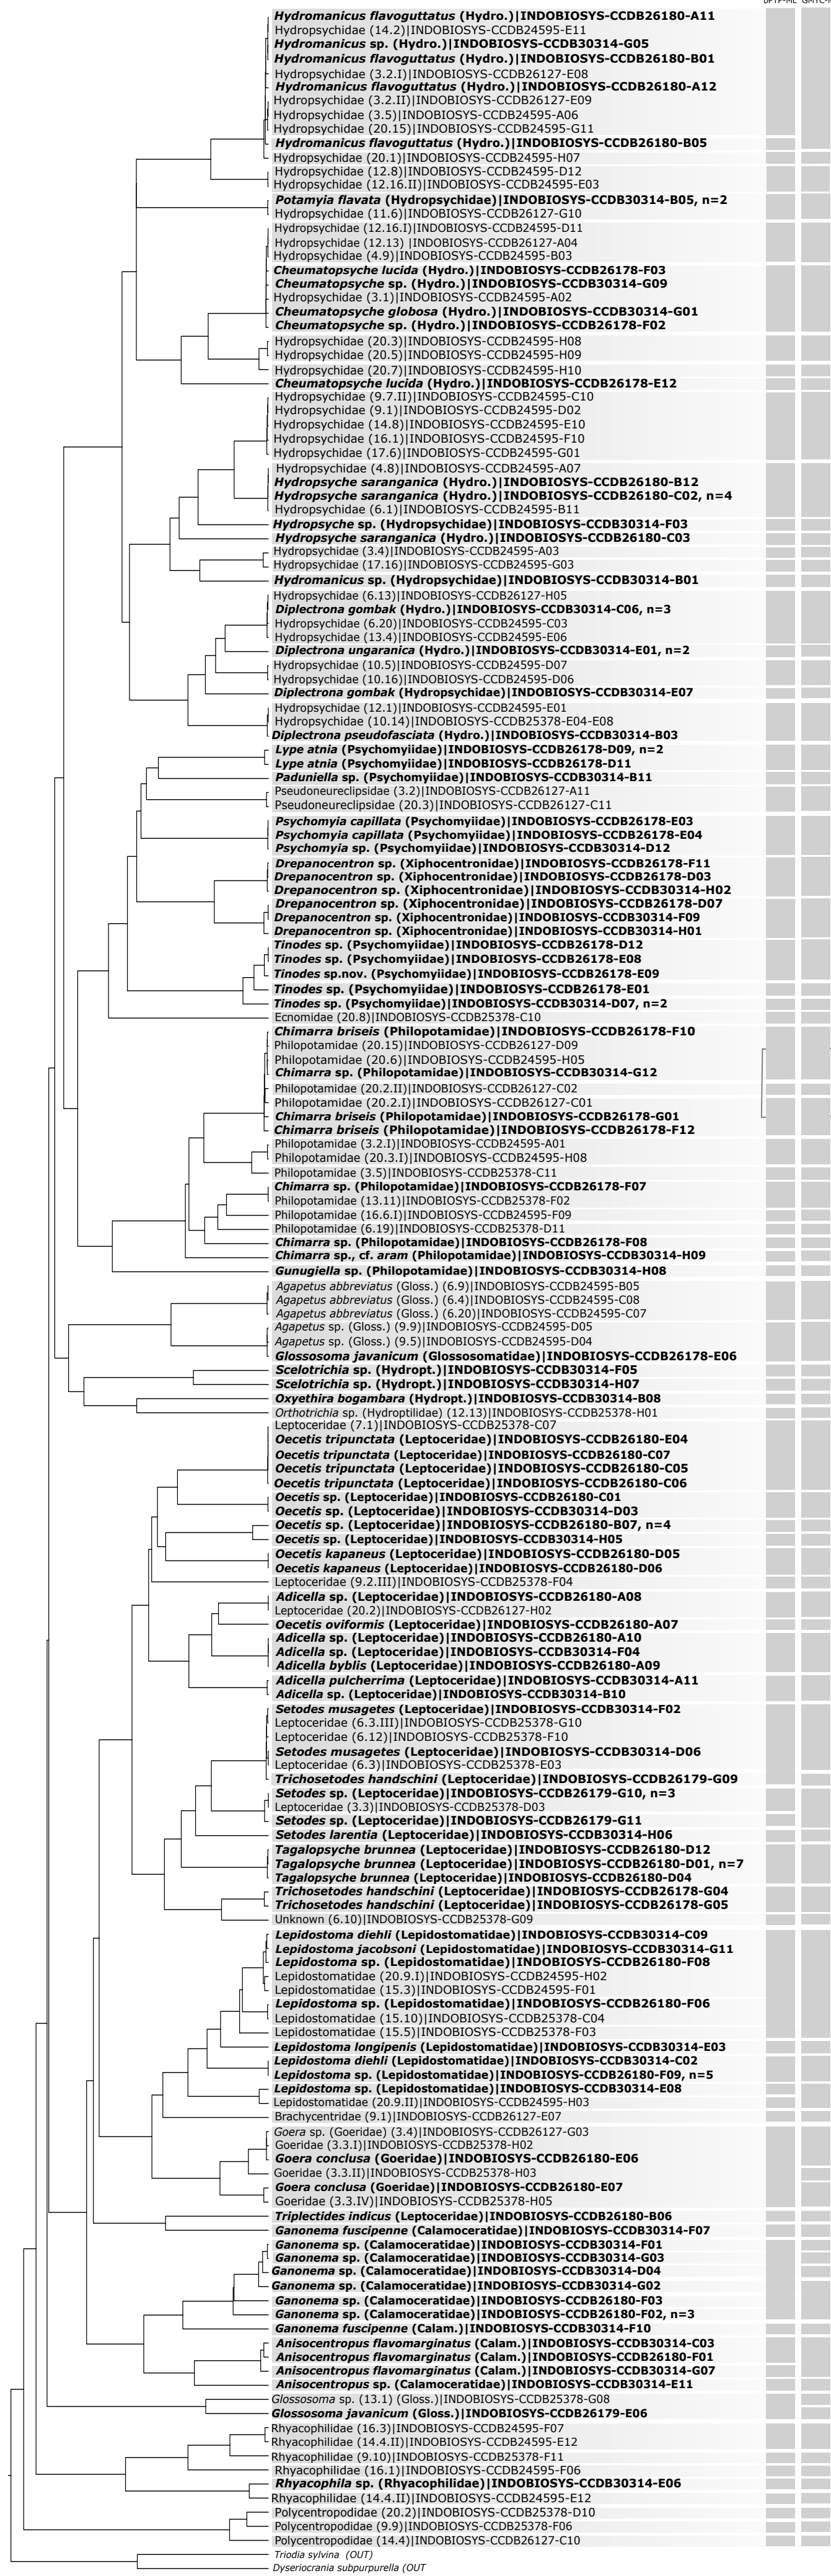

Supplement: Figure_S1_MLtree.pdf [file Figure_S1_MLtree.pdf]
