# Supplementary material for: DNA barcoding unveils a high diversity of caddisflies (Trichoptera) in the Mount Halimun Salak National Park (West Java; Indonesia)
Source: PeerJ journal article supplement (doi:10.7717/peerj.14182), 2022-12-12

all Trichoptera (128 seq.)

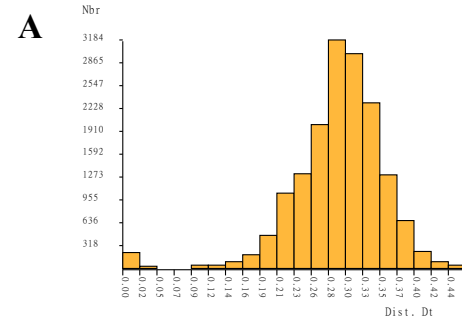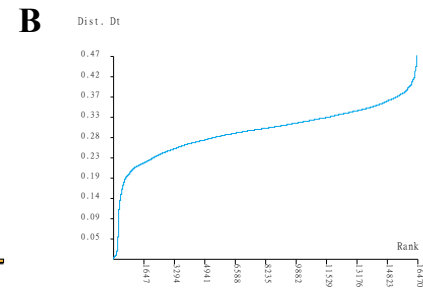

Calamoceratidae (12 seq.)

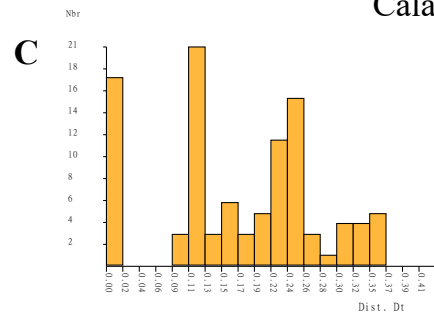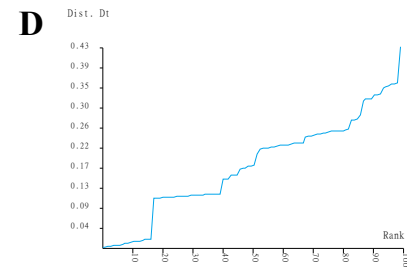

Leptoceridae (36 seq.)

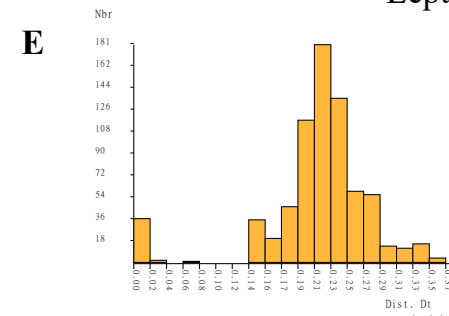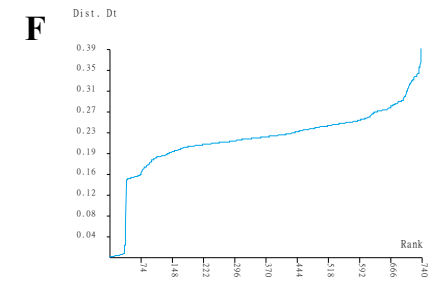

Hydropsychidae (52 seq.)

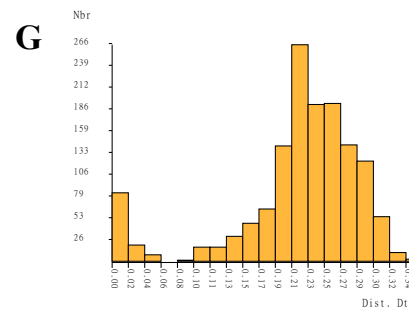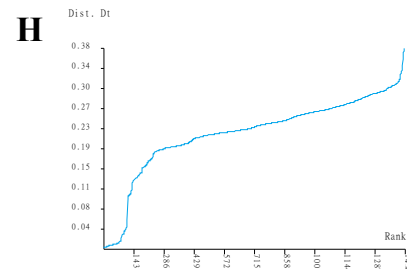

Philopotamidae (52 seq.)

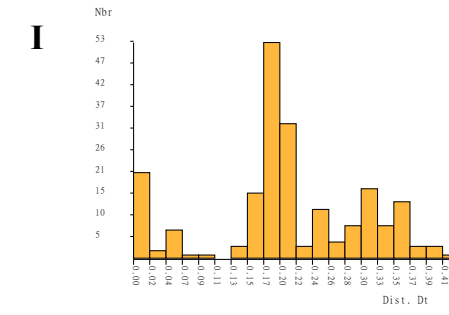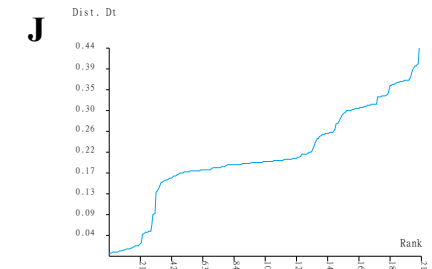

Lepidostomatidae (13 seq.)

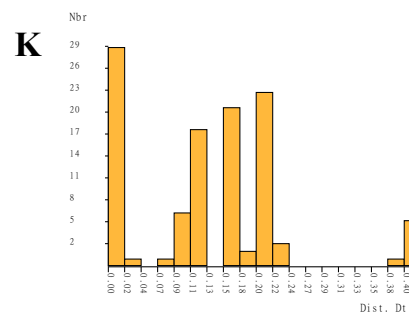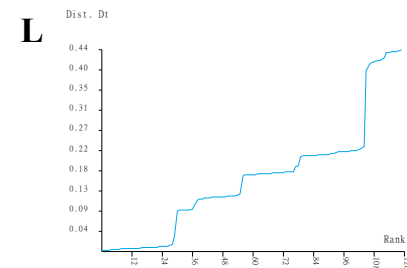

Psychomyiidae (11 seq.)

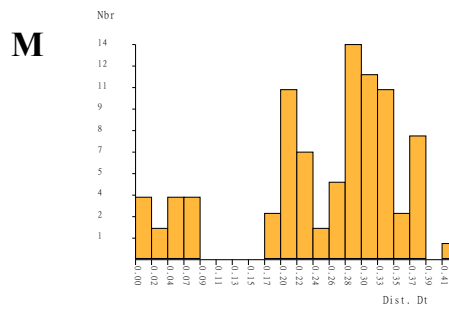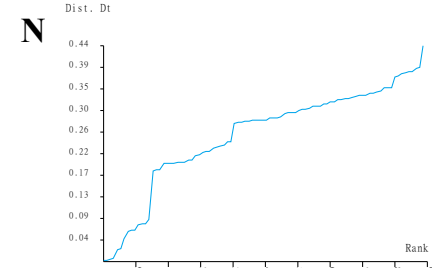

Supplement: Figure_S3.2_ASAP.pdf [file Figure_S3.2_ASAP.pdf]
