# Supplementary material for: DNA barcoding unveils a high diversity of caddisflies (Trichoptera) in the Mount Halimun Salak National Park (West Java; Indonesia)
Source: PeerJ. 2022 Dec 12;10:e14182. doi: 10.7717/peerj.14182 (PMC9753737; doi:10.7717/peerj.14182)
Supplement: Supplemental Information 2 — * Abbrevations used in Fig. 1. [file peerj-10-14182-s002.xlsx]

## Sheet: Tabelle1
Specimen ID/ Accession number	morphological identification	Life stage	Collection ID	COI Seq. Length	Tree tip abbreviation	BIN	Collection Date	Collector and Determiner	Country	State/Province	Region	Sampling site	Lat	Lon	Elevation [m]
INDOBIOSYS-CCDB24595-B05	Agapetus sp.	larva	Agapetus 6.9-VIII.1	658	Agapetus abbreviatus (Glossosomatidae), N=3	BOLD:ABA4545	2015-09-20	I.C. Kilian	Indonesia	Jawa Barat	West Java	river Sungai Cilumbu, traditional village, Mount Halimun Salak National Park	-6.84926	106.515	677
INDOBIOSYS-CCDB24595-C07	Agapetus sp.	larva	Agapetus 6.20-VIII.1	658	Agapetus abbreviatus (Glossosomatidae), N=3	BOLD:ABA4545	2015-09-20	I.C. Kilian	Indonesia	Jawa Barat	West Java	river Sungai Cilumbu, traditional village, Mount Halimun Salak National Park	-6.84926	106.515	677
INDOBIOSYS-CCDB24595-C08	Agapetus sp.	larva	Agapetus 6.4-VIII.1	658	Agapetus abbreviatus (Glossosomatidae), N=3	BOLD:ABA4545	2015-09-20	I.C. Kilian	Indonesia	Jawa Barat	West Java	river Sungai Cilumbu, traditional village, Mount Halimun Salak National Park	-6.84926	106.515	677
INDOBIOSYS-CCDB24595-D04	Agapetus sp.	larva	Agapetus 9.5-VIII.1	658		BOLD:ADD3808	2015-09-22	I.C. Kilian	Indonesia	Jawa Barat	West Java	river Sungai Cibareno, Mount Halimun Salak National Park	-6.81725	106.503	1052
INDOBIOSYS-CCDB24595-D05	Agapetus sp.	larva	Agapetus 9.9-VIII.1	658		BOLD:ADD3808	2015-09-22	I.C. Kilian	Indonesia	Jawa Barat	West Java	river Sungai Cibareno, Mount Halimun Salak National Park	-6.81725	106.503	1052
INDOBIOSYS-CCDB26127-E07	Brachycentridae	larva	Brachycentridae_msp_9.1	649		BOLD:ADB1554	2015-09-22	I.C. Kilian	Indonesia	Jawa Barat	West Java	river Sungai Cibareno, Mount Halimun Salak National Park	-6.81725	106.503	1052
INDOBIOSYS-CCDB26127-A11	Pseudoneureclipsidae	larva	Pseudoneureclipsidae_msp_3.2	525		BOLD:ADB1682	2015-09-17	I.C. Kilian	Indonesia	Jawa Barat	West Java	river Sungai Cibareno, Mount Halimun Salak National Park	-6.74617	106.54	976
INDOBIOSYS-CCDB26127-C11	Pseudoneureclipsidae	larva	Pseudoneureclipsidae_msp_20.3	603		BOLD:ADB1682	2015-10-06	I.C. Kilian	Indonesia	Jawa Barat	West Java	tributary river of Cikaniki river, Mount Halimun Salak National Park	-6.74372	106.536	1043
INDOBIOSYS-CCDB25378-C10	Ecnomidae	larva	Echomidae_msp_20.8	581		BOLD:ADB1485	2015-10-06	I.C. Kilian	Indonesia	Jawa Barat	West Java	tributary river of Cikaniki river, Mount Halimun Salak National Park	-6.74372	106.536	1043
INDOBIOSYS-CCDB25378-G08	Glossosoma sp.	larva	Glossosoma_13.1_2_9	638		BOLD:ADB3202	2015-09-29	I.C. Kilian	Indonesia	Jawa Barat	West Java	river Cirasamala, downstream, Cidahu, Mount Halimun Salak National Park	-6.75073	106.725	883
INDOBIOSYS-CCDB26127-G03	Goera sp.	larva	Goera_sp_3.4	569		BOLD:ADB2997	2015-09-17	I.C. Kilian	Indonesia	Jawa Barat	West Java	Cikaniki river, Cikaniki, Mount Halimun Salak National Park	-6.74617	106.54	976
INDOBIOSYS-CCDB25378-H02	Goeridae	larva	Goeridae_sp_3.3_1	617		BOLD:ADB2997	2015-09-17	I.C. Kilian	Indonesia	Jawa Barat	West Java	Cikaniki river, Cikaniki, Mount Halimun Salak National Park	-6.74617	106.54	976
INDOBIOSYS-CCDB25378-H03	Goeridae	larva	Goeridae_sp_3.3_2	660		BOLD:ADB2997	2015-09-17	I.C. Kilian	Indonesia	Jawa Barat	West Java	Cikaniki river, Cikaniki, Mount Halimun Salak National Park	-6.74617	106.54	976
INDOBIOSYS-CCDB25378-H05	Goeridae	larva	Goeridae_sp_3.3_4_	673		BOLD:ADB2997	2015-09-17	I.C. Kilian	Indonesia	Jawa Barat	West Java	Cikaniki river, Cikaniki, Mount Halimun Salak National Park	-6.74617	106.54	976
INDOBIOSYS-CCDB24595-A02	Hydropsychidae	larva	Hydropsychidae 3.1-XI.1	658	Cheumatopsyche globosa/lucida (Hydropsychidae) , N=5	BOLD:ADD3807	2015-09-17	I.C. Kilian	Indonesia	Jawa Barat	West Java	Cikaniki river, Cikaniki, Mount Halimun Salak National Park	-6.74617	106.54	976
INDOBIOSYS-CCDB24595-A03	Hydropsychidae	larva	Hydropsychidae 3.4-XI.1	658		BOLD:ADB1986	2015-09-17	I.C. Kilian	Indonesia	Jawa Barat	West Java	Cikaniki river, Cikaniki, Mount Halimun Salak National Park	-6.74617	106.54	976
INDOBIOSYS-CCDB24595-A06	Hydropsychidae	larva	Hydropsychidae 3.5-XI.1	658	Hydromanicus flavoguttatus (Hydropsychidae ), N=9	BOLD:ADB1553	2015-09-17	I.C. Kilian	Indonesia	Jawa Barat	West Java	Cikaniki river, Cikaniki, Mount Halimun Salak National Park	-6.74617	106.54	976
INDOBIOSYS-CCDB24595-A07	Hydropsychidae	larva	Hydropsychidae 4.8-XI.1	658	Hydropsyche saranganica (Hydropsychidae), N=4	BOLD:AAF0987	2015-09-18	I.C. Kilian	Indonesia	Jawa Barat	West Java	river Ciangsana, Enclave, Cikaniki, Mount Halimun Salak National Park	-6.71885	106.521	1019
INDOBIOSYS-CCDB24595-B03	Hydropsychidae	larva	Hydropsychidae 4.9-XI.1	658	Hydropsychidae msp.2 , N=3	BOLD:AAM8126	2015-09-18	I.C. Kilian	Indonesia	Jawa Barat	West Java	river Ciangsana, Enclave, Cikaniki, Mount Halimun Salak National Park	-6.71885	106.521	1019
INDOBIOSYS-CCDB24595-B11	Hydropsychidae	larva	Hydropsychidae 6.1-XI.1	658	Hydropsyche saranganica (Hydropsychidae), N=4	BOLD:AAF0987	2015-09-20	I.C. Kilian	Indonesia	Jawa Barat	West Java	river Sungai Cilumbu, traditional village, Mount Halimun Salak National Park	-6.84926	106.515	677
INDOBIOSYS-CCDB24595-C03	Hydropsychidae	larva	Hydropsychidae 6.20-XI.1	658		BOLD:ADB1464	2015-09-20	I.C. Kilian	Indonesia	Jawa Barat	West Java	river Sungai Cilumbu, traditional village, Mount Halimun Salak National Park	-6.84926	106.515	677
INDOBIOSYS-CCDB24595-C10	Hydropsychidae	larva	Hydropsychidae 9.7-XI.1	658	Hydropsychidae msp.1 , N=4	BOLD:ADB1866	2015-09-22	I.C. Kilian	Indonesia	Jawa Barat	West Java	river Sungai Cibareno, Mount Halimun Salak National Park	-6.81725	106.503	1052
INDOBIOSYS-CCDB24595-D02	Hydropsychidae	larva	Hydropsychidae 9.1-XI.1	658	Hydropsychidae msp.1 , N=4	BOLD:ADB1866	2015-09-22	I.C. Kilian	Indonesia	Jawa Barat	West Java	river Sungai Cibareno, Mount Halimun Salak National Park	-6.81725	106.503	1052
INDOBIOSYS-CCDB24595-D06	Hydropsychidae	larva	Hydropsychidae 10.16-XI.1	658		BOLD:ADE8365	2015-09-24	I.C. Kilian	Indonesia	Jawa Barat	West Java	river Ciletuh, Hunting ground	-7.14078	106.63	706
INDOBIOSYS-CCDB24595-D07	Hydropsychidae	larva	Hydropsychidae 10.5-XI.1	658		BOLD:ADE8365	2015-09-24	I.C. Kilian	Indonesia	Jawa Barat	West Java	river Ciletuh, Hunting ground	-7.14078	106.63	706
INDOBIOSYS-CCDB24595-D11	Hydropsychidae	larva	Hydropsychidae 12.16-XI.1	658	Hydropsychidae msp.2 , N=3	BOLD:AAM8126	2015-09-26	I.C. Kilian	Indonesia	Jawa Barat	West Java	river Cilulumpang, Hunting ground	-7.14521	106.64	739
INDOBIOSYS-CCDB24595-D12	Hydropsychidae	larva	Hydropsychidae 12.8-XI.1	658		BOLD:ADE8366	2015-09-26	I.C. Kilian	Indonesia	Jawa Barat	West Java	river Cilulumpang, Hunting ground	-7.14521	106.64	739
INDOBIOSYS-CCDB24595-E01	Hydropsychidae	larva	Hydropsychidae 12.1-XI.1	658		BOLD:ADB1387	2015-09-26	I.C. Kilian	Indonesia	Jawa Barat	West Java	river Cilulumpang, Hunting ground	-7.14521	106.64	739
INDOBIOSYS-CCDB24595-E03	Hydropsychidae	larva	Hydropsychidae 12.16-XI.1	658		BOLD:ADE8366	2015-09-26	I.C. Kilian	Indonesia	Jawa Barat	West Java	river Cilulumpang, Hunting ground	-7.14521	106.64	739
INDOBIOSYS-CCDB24595-E06	Hydropsychidae	larva	Hydropsychidae 13.4-XI.1	658		BOLD:ADB1464	2015-09-29	I.C. Kilian	Indonesia	Jawa Barat	West Java	river Cirasamala, downstream, Cidahu, Mount Halimun Salak National Park	-6.75073	106.725	883
INDOBIOSYS-CCDB24595-E10	Hydropsychidae	larva	Hydropsychidae 14.8-XI.1	658	Hydropsychidae msp.1 , N=4	BOLD:ADB1866	2015-09-29	I.C. Kilian	Indonesia	Jawa Barat	West Java	river Cirasamala, upstream, Cidahu, Mount Halimun Salak National Park	-6.73832	106.715	1205
INDOBIOSYS-CCDB24595-E11	Hydropsychidae	larva	Hydropsychidae 14.2-XI.1	658	Hydromanicus flavoguttatus (Hydropsychidae ), N=9	BOLD:ADB1553	2015-09-29	I.C. Kilian	Indonesia	Jawa Barat	West Java	river Cirasamala, upstream, Cidahu, Mount Halimun Salak National Park	-6.73832	106.715	1205
INDOBIOSYS-CCDB24595-F10	Hydropsychidae	larva	Hydropsychidae 16.1-XI.1	658	Hydropsychidae msp.1 , N=4	BOLD:ADB1866	2015-09-30	I.C. Kilian	Indonesia	Jawa Barat	West Java	river Cirasamala, upstream, Cidahu, Mount Halimun Salak National Park	-6.73815	106.715	1205
INDOBIOSYS-CCDB24595-G01	Hydropsychidae	larva	Hydropsychidae 17.6-XI.1	658		BOLD:ADB1866	2015-10-02	I.C. Kilian	Indonesia	Jawa Barat	West Java	river Ciampea,Gunung Bunder, Mount Halimun Salak National Park	-6.60344	106.707	1042
INDOBIOSYS-CCDB24595-G03	Hydropsychidae	larva	Hydropsychidae 17.16-XI.1	658		BOLD:ADB1986	2015-10-02	I.C. Kilian	Indonesia	Jawa Barat	West Java	river Ciampea,Gunung Bunder, Mount Halimun Salak National Park	-6.60344	106.707	1042
INDOBIOSYS-CCDB24595-G11	Hydropsychidae	larva	Hydropsychidae 20.15-XI.1	658	Hydromanicus flavoguttatus (Hydropsychidae ), N=9	BOLD:ADB1553	2015-10-06	I.C. Kilian	Indonesia	Jawa Barat	West Java	tributary river of Cikaniki river, Mount Halimun Salak National Park	-6.74372	106.536	1043
INDOBIOSYS-CCDB24595-H07	Hydropsychidae	larva	Hydropsychidae 20.1-XI.1	658		BOLD:ADB1553	2015-10-06	I.C. Kilian	Indonesia	Jawa Barat	West Java	tributary river of Cikaniki river, Mount Halimun Salak National Park	-6.74372	106.536	1043
INDOBIOSYS-CCDB24595-H08	Hydropsychidae	larva	Hydropsychidae 20.3-XI.1	658		BOLD:ADB1681	2015-10-06	I.C. Kilian	Indonesia	Jawa Barat	West Java	tributary river of Cikaniki river, Mount Halimun Salak National Park	-6.74372	106.536	1043
INDOBIOSYS-CCDB24595-H09	Hydropsychidae	larva	Hydropsychidae 20.5-XI.1	658		BOLD:ADB1681	2015-10-06	I.C. Kilian	Indonesia	Jawa Barat	West Java	tributary river of Cikaniki river, Mount Halimun Salak National Park	-6.74372	106.536	1043
INDOBIOSYS-CCDB24595-H10	Hydropsychidae	larva	Hydropsychidae 20.7-XI.1	658		BOLD:ADB1683	2015-10-06	I.C. Kilian	Indonesia	Jawa Barat	West Java	tributary river of Cikaniki river, Mount Halimun Salak National Park	-6.74372	106.536	1043
INDOBIOSYS-CCDB25378-E04-E08	Hydropsychidae	larva	Hydropsychidae_msp_10.14_1	648		BOLD:ADB1387	2015-09-24	I.C. Kilian	Indonesia	Jawa Barat	West Java	river Ciletuh, Hunting ground	-7.14078	106.63	706
INDOBIOSYS-CCDB26127-A04	Hydropsychidae	larva	Hydropsychidae_sp_12.13	627	Hydropsychidae msp.2 , N=3	BOLD:AAM8126	2015-09-26	I.C. Kilian	Indonesia	Jawa Barat	West Java	river Cilulumpang, Hunting ground	-7.14521	106.64	739
INDOBIOSYS-CCDB26127-E08	Hydropsychidae	larva	Hydropsychidae_msp_3.2_1	658	Hydromanicus flavoguttatus (Hydropsychidae ), N=9		2015-09-17	I.C. Kilian	Indonesia	Jawa Barat	West Java	Cikaniki river, Cikaniki, Mount Halimun Salak National Park	-6.74617	106.54	976
INDOBIOSYS-CCDB26127-E09	Hydropsychidae	larva	Hydropsychidae_msp_3.2_2	630	Hydromanicus flavoguttatus (Hydropsychidae ), N=9	BOLD:ADB1553	2015-09-17	I.C. Kilian	Indonesia	Jawa Barat	West Java	Cikaniki river, Cikaniki, Mount Halimun Salak National Park	-6.74617	106.54	976
INDOBIOSYS-CCDB26127-H05	Hydropsychidae	larva	Hydropsychidae_msp_6.13	540		BOLD:ADB1464	2015-09-20	I.C. Kilian	Indonesia	Jawa Barat	West Java	river Sungai Cilumbu, traditional village, Mount Halimun Salak National Park	-6.84926	106.515	677
INDOBIOSYS-CCDB24595-F01	Lepidostomatidae	larva	Lepidostomatidae 15.3-XIII.1	658	Lepidostoma diehli/jacobsoni (Lepidostomatidae), N=8	BOLD:ADB2995	2015-09-30	I.C. Kilian	Indonesia	Jawa Barat	West Java	river Cipamatutan, Cidahu, Mount Halimun Salak National Park	-6.73832	106.715	888
INDOBIOSYS-CCDB24595-H02	Lepidostomatidae	larva	Lepidostomatidae 20.9-XIII.1.1	658	Lepidostoma diehli/jacobsoni (Lepidostomatidae), N=8	BOLD:ADB2995	2015-10-06	I.C. Kilian	Indonesia	Jawa Barat	West Java	tributary river of Cikaniki river, Mount Halimun Salak National Park	-6.74372	106.536	1043
INDOBIOSYS-CCDB24595-H03	Lepidostomatidae	larva	Lepidostomatidae 20.9-XIII.1.2	658		BOLD:ADB1762	2015-10-06	I.C. Kilian	Indonesia	Jawa Barat	West Java	tributary river of Cikaniki river, Mount Halimun Salak National Park	-6.74372	106.536	1043
INDOBIOSYS-CCDB25378-C04	Lepidostomatidae	larva	Lepidostomatidae_msp_15.10	637	Lepidostoma diehli/jacobsoni (Lepidostomatidae), N=8	BOLD:ADB2995	2015-09-30	I.C. Kilian	Indonesia	Jawa Barat	West Java	river Cipamatutan, Cidahu, Mount Halimun Salak National Park	-6.73832	106.715	888
INDOBIOSYS-CCDB25378-F03	Lepidostomatidae	larva	Lepidostomatidae_msp_15.5	481	Lepidostoma diehli/jacobsoni (Lepidostomatidae), N=8	BOLD:ADB2995	2015-09-30	I.C. Kilian	Indonesia	Jawa Barat	West Java	river Cipamatutan, Cidahu, Mount Halimun Salak National Park	-6.73832	106.715	888
INDOBIOSYS-CCDB25378-C07	Leptoceridae	larva	Leptoceridae_msp_7.1	561		BOLD:ADB3102	2015-09-21	I.C. Kilian	Indonesia	Jawa Barat	West Java	river Sungai Cilumbu, traditional village, Mount Halimun Salak National Park	-6.84926	106.526	757
INDOBIOSYS-CCDB25378-D03	Leptoceridae	larva	Leptoceridae_msp_3.3	530		BOLD:ADB1486	2015-09-17	I.C. Kilian	Indonesia	Jawa Barat	West Java	Cikaniki river, Cikaniki, Mount Halimun Salak National Park	-6.74617	106.54	976
INDOBIOSYS-CCDB25378-E03	Leptoceridae	larva	Leptoceridae_msp_6.3	661	Trichosetodes handschini/Setodes musagetes (Leptoceridae) , N=6	BOLD:ADB3100	2015-09-20	I.C. Kilian	Indonesia	Jawa Barat	West Java	river Sungai Cilumbu, traditional village, Mount Halimun Salak National Park	-6.84926	106.515	677
INDOBIOSYS-CCDB25378-F04	Leptoceridae	larva	Leptoceridae_msp_3_9.2	569		BOLD:ADB1987	2015-09-22	I.C. Kilian	Indonesia	Jawa Barat	West Java	river Sungai Cibareno, Mount Halimun Salak National Park	-6.81725	106.503	1052
INDOBIOSYS-CCDB25378-F10	Leptoceridae	larva	Leptoceridae_msp_6.12	633	Trichosetodes handschini/Setodes musagetes (Leptoceridae) , N=6	BOLD:ADB3100	2015-09-20	I.C. Kilian	Indonesia	Jawa Barat	West Java	river Sungai Cilumbu, traditional village, Mount Halimun Salak National Park	-6.84926	106.515	677
INDOBIOSYS-CCDB25378-G10	Leptoceridae	larva	Leptoceridae_msp_3_6.3	618	Trichosetodes handschini/Setodes musagetes (Leptoceridae) , N=6	BOLD:ADB3100	2015-09-20	I.C. Kilian	Indonesia	Jawa Barat	West Java	river Sungai Cilumbu, traditional village, Mount Halimun Salak National Park	-6.84926	106.515	677
INDOBIOSYS-CCDB26127-H02	Leptoceridae	larva	Leptoceridae_msp_20.2	587		BOLD:ADB1465	2015-10-06	I.C. Kilian	Indonesia	Jawa Barat	West Java	tributary river of Cikaniki river, Mount Halimun Salak National Park	-6.74372	106.536	1043
INDOBIOSYS-CCDB25378-H01	Orthotrichia sp.	larva	Orthotrichia_sp_12.13	658			2015-09-26	I.C. Kilian	Indonesia	Jawa Barat	West Java	river Cilulumpang, Hunting ground	-7.14521	106.64	739
INDOBIOSYS-CCDB24595-A01	Philopotamidae	larva	Philopotamidae 3.2-XV.1	658		BOLD:ADB1463	2015-09-17	I.C. Kilian	Indonesia	Jawa Barat	West Java	Cikaniki river, Cikaniki, Mount Halimun Salak National Park	-6.74617	106.54	976
INDOBIOSYS-CCDB24595-F09	Philopotamidae	larva	Philopotamidae 16.6-XV.1	658		BOLD:ADE9306	2015-09-30	I.C. Kilian	Indonesia	Jawa Barat	West Java	river Cirasamala, upstream, Cidahu, Mount Halimun Salak National Park	-6.73815	106.715	1205
INDOBIOSYS-CCDB24595-H05	Philopotamidae	larva	Philopotamidae 20.6-XV.1	658	Chimarra briseis (Philopotamidae), N=7	BOLD:ADB1552	2015-10-06	I.C. Kilian	Indonesia	Jawa Barat	West Java	tributary river of Cikaniki river, Mount Halimun Salak National Park	-6.74372	106.536	1043
INDOBIOSYS-CCDB24595-H06	Philopotamidae	larva	Philopotamidae 20.3-XV.1	658		BOLD:ADB1463	2015-10-06	I.C. Kilian	Indonesia	Jawa Barat	West Java	tributary river of Cikaniki river, Mount Halimun Salak National Park	-6.74372	106.536	1043
INDOBIOSYS-CCDB25378-C11	Philopotamidae	larva	Philopotamidae_msp_3.5	569		BOLD:ADB1983	2015-09-17	I.C. Kilian	Indonesia	Jawa Barat	West Java	Cikaniki river, Cikaniki, Mount Halimun Salak National Park	-6.74617	106.54	976
INDOBIOSYS-CCDB25378-D11	Philopotamidae	larva	Philopotamidae_msp_6.19	542		BOLD:ADB1985	2015-09-20	I.C. Kilian	Indonesia	Jawa Barat	West Java	river Sungai Cilumbu, traditional village, Mount Halimun Salak National Park	-6.84926	106.515	677
INDOBIOSYS-CCDB25378-F02	Philopotamidae	larva	Philopotamidae_msp_13.11	681		BOLD:ADB1273	2015-09-29	I.C. Kilian	Indonesia	Jawa Barat	West Java	river Cirasamala, downstream, Cidahu, Mount Halimun Salak National Park	-6.75073	106.725	883
INDOBIOSYS-CCDB26127-C01	Philopotamidae	larva	Philopotamidae_msp_20.2_1	552	Chimarra briseis (Philopotamidae), N=7	BOLD:ADB1552	2015-10-06	I.C. Kilian	Indonesia	Jawa Barat	West Java	tributary river of Cikaniki river, Mount Halimun Salak National Park	-6.74372	106.536	1043
INDOBIOSYS-CCDB26127-C02	Philopotamidae	larva	Philopotamidae_msp_20.2_2	539			2015-10-06	I.C. Kilian	Indonesia	Jawa Barat	West Java	tributary river of Cikaniki river, Mount Halimun Salak National Park	-6.74372	106.536	1043
INDOBIOSYS-CCDB26127-D09	Philopotamidae	larva	Philopotamidae_msp_20.15	544	Chimarra briseis (Philopotamidae), N=7	BOLD:ADB1552	2015-10-06	I.C. Kilian	Indonesia	Jawa Barat	West Java	tributary river of Cikaniki river, Mount Halimun Salak National Park	-6.74372	106.536	1043
INDOBIOSYS-CCDB25378-D10	Polycentropodidae	larva	Polycentropodidae_msp_20.2	642		BOLD:ADB1487	2015-10-06	I.C. Kilian	Indonesia	Jawa Barat	West Java	tributary river of Cikaniki river, Mount Halimun Salak National Park	-6.74372	106.536	1043
INDOBIOSYS-CCDB25378-F06	Polycentropodidae	larva	Polycentropodidae_msp_9.9	666		BOLD:ADB1487	2015-09-22	I.C. Kilian	Indonesia	Jawa Barat	West Java	river Sungai Cibareno, Mount Halimun Salak National Park	-6.81725	106.503	1052
INDOBIOSYS-CCDB26127-C10	Polycentropodidae	larva	Polycentropodidae_msp_14.4	524		BOLD:ADB1487	2015-09-29	I.C. Kilian	Indonesia	Jawa Barat	West Java	river Cirasamala, upstream, Cidahu, Mount Halimun Salak National Park	-6.73832	106.715	1205
INDOBIOSYS-CCDB24595-E09	Rhyacophilidae	larva	Rhyacophilidae 14.4-XVIII.1.1	658		BOLD:ADE5292	2015-09-29	I.C. Kilian	Indonesia	Jawa Barat	West Java	river Cirasamala, upstream, Cidahu, Mount Halimun Salak National Park	-6.73832	106.715	1205
INDOBIOSYS-CCDB24595-E12	Rhyacophilidae	larva	Rhyacophilidae 14.4-XVIII.1.2	658	Rhyacophilidae msp.1 , N=4	BOLD:ADB1555	2015-09-29	I.C. Kilian	Indonesia	Jawa Barat	West Java	river Cirasamala, upstream, Cidahu, Mount Halimun Salak National Park	-6.73832	106.715	1205
INDOBIOSYS-CCDB24595-F06	Rhyacophilidae	larva	Rhyacophilidae 16.1-XVIII.1.2	658	Rhyacophilidae msp.1 , N=4	BOLD:ADB1556	2015-09-30	I.C. Kilian	Indonesia	Jawa Barat	West Java	river Cirasamala, upstream, Cidahu, Mount Halimun Salak National Park	-6.73815	106.715	1205
INDOBIOSYS-CCDB24595-F07	Rhyacophilidae	larva	Rhyacophilidae 16.3-XVIII.1.1	658	Rhyacophilidae msp.1 , N=4	BOLD:ADB1555	2015-09-30	I.C. Kilian	Indonesia	Jawa Barat	West Java	river Cirasamala, upstream, Cidahu, Mount Halimun Salak National Park	-6.73815	106.715	1205
INDOBIOSYS-CCDB25378-F11	Rhyacophilidae	larva	Rhyacophilidae_msp_9.10	568	Rhyacophilidae msp.1 , N=4		2015-09-22	I.C. Kilian	Indonesia	Jawa Barat	West Java	river Sungai Cibareno, Mount Halimun Salak National Park	-6.81725	106.503	1052
INDOBIOSYS-CCDB25378-G09	unknown	larva	Unknown_msp_6.10	632		BOLD:ADB2994	2015-09-20	I.C. Kilian	Indonesia	Jawa Barat	West Java	river Sungai Cilumbu, traditional village, Mount Halimun Salak National Park	-6.84926	106.515	677
INDOBIOSYS-CCDB26127-G10	Hydropsychidae	larva	Hydropsychidae_11.6	624		BOLD:ABA2418	2015-09-25	I.C. Kilian	Indonesia	Jawa Barat	West Java	Hunting ground, river Cikarang	-7.234	106.614	252
INDOBIOSYS-CCDB26180-F01	Anisocentropus flavomarginatus Ulmer, 1906	adult	Calamoceratidae	658	Anisocentropus flavomarginatus (Calam.), N=3	BOLD:ADD0969	2015-10-18	W. Mey	Indonesia	Jawa Barat	West Java	Cikaniki Stn., Mount Halimun Salak National Park	-6.749	106.535	1144
INDOBIOSYS-CCDB30314-C03	Anisocentropus flavomarginatus Ulmer, 1906	adult	Calamoceratidae	658	Anisocentropus flavomarginatus (Calam.), N=3	BOLD:ADD0969	2016-04-20	W. Mey	Indonesia	Jawa Barat	West Java	Cikaniki Stn, Mount Halimun Salak National Park, right tributary Nr. 1 to Cikaniki River	-6.748117	106.539533	1350
INDOBIOSYS-CCDB30314-G07	Anisocentropus flavomarginatus Ulmer, 1906	adult	Calamoceratidae	658	Anisocentropus flavomarginatus (Calam.), N=3	BOLD:ADD0969	2016-04-20	W. Mey	Indonesia	Jawa Barat	West Java	Cikaniki Stn., Mount Halimun Salak National Park	-6.749	106.535	1144
INDOBIOSYS-CCDB30314-D04	Ganonema sp.	adult	Calamoceratidae	658	Ganonema sp. (Calamoceratidae), N=6	BOLD:ADB1984	2016-04-13	W. Mey	Indonesia	Jawa Barat	West Java	Cidahu, Mount Halimun Salak National Park	-6732	106.707383	1350
INDOBIOSYS-CCDB30314-E11	Anisocentropus sp.	adult	Calamoceratidae	658		BOLD:ADI5351	2016-04-13	W. Mey	Indonesia	Jawa Barat	West Java	Cidahu, Mount Halimun Salak National Park, Sg. Citrasamala	-6.73065	106.706667	1400
INDOBIOSYS-CCDB30314-F01	Ganonema fuscipenne Albarda, 1881	adult	Calamoceratidae	658	Ganonema sp. (Calamoceratidae), N=6	BOLD:ADB1984	2016-04-14	W. Mey	Indonesia	Jawa Barat	West Java	Cidahu, Mount Halimun Salak National Park, LF, Sg. Cibojang, LF Tower	-6.745733	106.713783	1100
INDOBIOSYS-CCDB30314-F10	Ganonema fuscipenne Albarda, 1881	adult	Calamoceratidae	658		BOLD:ADI6738	2016-04-20	W. Mey	Indonesia	Jawa Barat	West Java	Cikaniki Stn, Mount Halimun Salak National Park, right tributary Nr. 5 to Cikaniki River	-6.749167	106.542017	1350
INDOBIOSYS-CCDB30314-G02	Ganonema fuscipenne Albarda, 1881	adult	Calamoceratidae	658	Ganonema sp. (Calamoceratidae), N=6	BOLD:ADB1984	2016-04-20	W. Mey	Indonesia	Jawa Barat	West Java	Cikaniki Stn, Mount Halimun Salak National Park, Curug Macan, LF	-6.743517	106.534817	950
INDOBIOSYS-CCDB30314-G03	Ganonema fuscipenne Albarda, 1881	adult	Calamoceratidae	658	Ganonema sp. (Calamoceratidae), N=6	BOLD:ADB1984	2016-04-20	W. Mey	Indonesia	Jawa Barat	West Java	Cikaniki Stn, Mount Halimun Salak National Park, Curug Macan, LF	-6.743517	106.534817	950
INDOBIOSYS-CCDB26180-F02	Ganonema ochraceellum McLachlan, 1866	adult	Calamoceratidae	658	Ganonema sp. (Calamoceratidae), N=6	BOLD:ADB1984	2015-10-18	W. Mey	Indonesia	Jawa Barat	West Java	Cikaniki Stn., Mount Halimun Salak National Park	-6.749	106.535	1144
INDOBIOSYS-CCDB26180-F03	Ganonema ochraceellum McLachlan, 1866	adult	Calamoceratidae	658	Ganonema sp. (Calamoceratidae), N=6	BOLD:ADB1984	2015-10-18	W. Mey	Indonesia	Jawa Barat	West Java	Cikaniki Stn., Mount Halimun Salak National Park	-6.749	106.535	1144
INDOBIOSYS-CCDB26178-E06	Glossosoma javanicum Ulmer, 1930	adult	Glossosomatidae	658		BOLD:ADD3808	2015-10-18	W. Mey	Indonesia	Jawa Barat	West Java	Cikaniki Stn., Mount Halimun Salak National Park	-6.749	106.535	1144
INDOBIOSYS-CCDB26179-E06	Glossosoma javanicum Ulmer, 1930	adult	Glossosomatidae	658		BOLD:ADB3202	2015-10-18	W. Mey	Indonesia	Jawa Barat	West Java	Cikaniki Stn., Mount Halimun Salak National Park	-6.749	106.535	1144
INDOBIOSYS-CCDB26180-E06	Goera conclusa Ulmer, 1905	adult	Goeridae	658		BOLD:ADB2997	2015-10-18	W. Mey	Indonesia	Jawa Barat	West Java	Cikaniki Stn., Mount Halimun Salak National Park	-6.749	106.535	1144
INDOBIOSYS-CCDB26180-E07	Goera conclusa Ulmer, 1905	adult	Goeridae	658		BOLD:ADB2997	2015-10-18	W. Mey	Indonesia	Jawa Barat	West Java	Cikaniki Stn., Mount Halimun Salak National Park	-6.749	106.535	1144
INDOBIOSYS-CCDB30314-F07	Helicopsyche sp.	adult	Helicopsychidae	631		BOLD:ADJ1628	2016-04-13	W. Mey	Indonesia	Jawa Barat	West Java	Ciapus, Mount Halimun Salak National Park, Curug Nangka TF	-6.671633	106.727033	800
INDOBIOSYS-CCDB30314-G01	Cheumatopsyche globosa Ulmer, 1910	adult	Hydropsychidae	658	Cheumatopsyche globosa/lucida (Hydropsychidae) , N=5	BOLD:ADD3807	2016-04-20	W. Mey	Indonesia	Jawa Barat	West Java	Cikaniki Stn, Mount Halimun Salak National Park, Curug Macan, LF	-6.743517	106.534817	950
INDOBIOSYS-CCDB26178-E12	Cheumatopsyche lucida Ulmer, 1907	adult	Hydropsychidae	658		BOLD:AAM8123	2015-10-18	W. Mey	Indonesia	Jawa Barat	West Java	Cikaniki Stn., Mount Halimun Salak National Park	-6.749	106.535	1144
INDOBIOSYS-CCDB26178-F03	Cheumatopsyche lucida Ulmer, 1907	adult	Hydropsychidae	658	Cheumatopsyche globosa/lucida (Hydropsychidae) , N=5	BOLD:ADD3807	2015-10-18	W. Mey	Indonesia	Jawa Barat	West Java	Cikaniki Stn., Mount Halimun Salak National Park	-6.749	106.535	1144
INDOBIOSYS-CCDB26178-F02	Cheumatopsyche sp.	adult	Hydropsychidae	658	Cheumatopsyche globosa/lucida (Hydropsychidae) , N=5	BOLD:ADD3807	2015-10-18	W. Mey	Indonesia	Jawa Barat	West Java	Cikaniki Stn., Mount Halimun Salak National Park	-6.749	106.535	1144
INDOBIOSYS-CCDB30314-G09	Cheumatopsyche sp.	adult	Hydropsychidae	658	Cheumatopsyche globosa/lucida (Hydropsychidae) , N=5	BOLD:ADD3807	2016-04-20	W. Mey	Indonesia	Jawa Barat	West Java	Cikaniki Stn., Mount Halimun Salak National Park	-6.749	106.535	1144
INDOBIOSYS-CCDB30314-C06	Diplectrona gombak Olah, 1993	adult	Hydropsychidae	658		BOLD:ADB1464	2016-04-20	W. Mey	Indonesia	Jawa Barat	West Java	Cikaniki Stn, Mount Halimun Salak National Park, right tributary Nr. 1 to Cikaniki River	-6.748117	106.539533	1350
INDOBIOSYS-CCDB30314-E07	Diplectrona gombak Olah, 1993	adult	Hydropsychidae	658		BOLD:ADB3203	2016-04-14	W. Mey	Indonesia	Jawa Barat	West Java	Cidahu, Mount Halimun Salak National Park, LF, Sg. Cibojang, LF Tower	-6.745733	106.713783	1100
INDOBIOSYS-CCDB30314-B03	Diplectrona pseudofasciata Ulmer, 1909	adult	Hydropsychidae	658			2016-04-20	W. Mey	Indonesia	Jawa Barat	West Java	Cikaniki Stn., Mount Halimun Salak National Park	-6.749	106.535	1144
INDOBIOSYS-CCDB30314-E01	Diplectrona ungaranica Ulmer, 1951	adult	Hydropsychidae	658		BOLD:ADJ3729	2016-04-14	W. Mey	Indonesia	Jawa Barat	West Java	Cidahu, Mount Halimun Salak National Park, LF, Sg. Cibojang, LF Tower	-6.745733	106.713783	1100
INDOBIOSYS-CCDB26180-A11	Hydromanicus flavoguttatus Albarda, 1881	adult	Hydropsychidae	658	Hydromanicus flavoguttatus (Hydropsychidae ), N=9	BOLD:ADB1553	2015-10-18	W. Mey	Indonesia	Jawa Barat	West Java	Cikaniki Stn., Mount Halimun Salak National Park	-6.749	106.535	1144
INDOBIOSYS-CCDB26180-A12	Hydromanicus flavoguttatus Albarda, 1881	adult	Hydropsychidae	658	Hydromanicus flavoguttatus (Hydropsychidae ), N=9	BOLD:ADB1553	2015-10-18	W. Mey	Indonesia	Jawa Barat	West Java	Cikaniki Stn., Mount Halimun Salak National Park	-6.749	106.535	1144
INDOBIOSYS-CCDB26180-B01	Hydromanicus flavoguttatus Albarda, 1881	adult	Hydropsychidae	658	Hydromanicus flavoguttatus (Hydropsychidae ), N=9	BOLD:ADB1553	2015-10-18	W. Mey	Indonesia	Jawa Barat	West Java	Cikaniki Stn., Mount Halimun Salak National Park	-6.749	106.535	1144
INDOBIOSYS-CCDB26180-B05	Hydromanicus flavoguttatus Albarda, 1881	adult	Hydropsychidae	658		BOLD:ADD3809	2015-10-18	W. Mey	Indonesia	Jawa Barat	West Java	Cikaniki Stn., Mount Halimun Salak National Park	-6.749	106.535	1144
INDOBIOSYS-CCDB30314-B01	Hydromanicus sp.	adult	Hydropsychidae	658		BOLD:ADI9428	2016-04-13	W. Mey	Indonesia	Jawa Barat	West Java	Ciapus, Mount Halimun Salak National Park, Curug Nangka TF	-6.671633	106.727033	800
INDOBIOSYS-CCDB30314-G05	Hydromanicus sp.	adult	Hydropsychidae	658	Hydromanicus flavoguttatus (Hydropsychidae ), N=9	BOLD:ADB1553	2016-04-20	W. Mey	Indonesia	Jawa Barat	West Java	Cikaniki Stn, Mount Halimun Salak National Park, Curug Macan, LF	-6.743517	106.534817	950
INDOBIOSYS-CCDB26180-B12	Hydropsyche saranganica Ulmer, 1951	adult	Hydropsychidae	658	Hydropsyche saranganica (Hydropsychidae), N=4	BOLD:AAF0987	2015-10-18	W. Mey	Indonesia	Jawa Barat	West Java	Cikaniki Stn., Mount Halimun Salak National Park	-6.749	106.535	1144
INDOBIOSYS-CCDB26180-C02	Hydropsyche saranganica Ulmer, 1951	adult	Hydropsychidae	658	Hydropsyche saranganica (Hydropsychidae), N=4	BOLD:AAF0987	2015-10-18	W. Mey	Indonesia	Jawa Barat	West Java	Cikaniki Stn., Mount Halimun Salak National Park	-6.749	106.535	1144
INDOBIOSYS-CCDB26180-C03	Hydropsyche saranganica Ulmer, 1951	adult	Hydropsychidae	658		BOLD:ADD2726	2015-10-18	W. Mey	Indonesia	Jawa Barat	West Java	Cikaniki Stn., Mount Halimun Salak National Park	-6.749	106.535	1144
INDOBIOSYS-CCDB30314-F03	Hydropsyche sp.	adult	Hydropsychidae	658		BOLD:AAM8122	2016-04-10	W. Mey	Indonesia	Jawa Barat	West Java	Bogor Botanical Garden, TF	-6.6016	106.802717	1350
INDOBIOSYS-CCDB30314-F05	Scelotrichia sp.	adult	Hydroptilidae	658		BOLD:ADI5606	2016-04-13	W. Mey	Indonesia	Jawa Barat	West Java	Ciapus, Mount Halimun Salak National Park, Curug Nangka TF	-6.671633	106.727033	800
INDOBIOSYS-CCDB30314-H07	Scelotrichia sp.	adult	Hydroptilidae	658		BOLD:ADJ0969	2016-04-13	W. Mey	Indonesia	Jawa Barat	West Java	Cidahu, Mount Halimun Salak National Park, Sg. Citrasamala	-6.73065	106.706667	1400
INDOBIOSYS-CCDB30314-B08	Hydroptilidae	adult	Hydroptilidae	658		BOLD:ABW1848	2016-04-20	W. Mey	Indonesia	Jawa Barat	West Java	Cikaniki Stn., Mount Halimun Salak National Park	-6.749	106.535	1144
INDOBIOSYS-CCDB30314-C02	Lepidostoma diehli Weaver, 1989	adult	Lepidostomatidae	658		BOLD:ADD0561	2016-04-20	W. Mey	Indonesia	Jawa Barat	West Java	Cikaniki Stn, Mount Halimun Salak National Park, LF	-6.749	106.535	1350
INDOBIOSYS-CCDB30314-C09	Lepidostoma diehli Weaver, 1989	adult	Lepidostomatidae	658	Lepidostoma diehli/jacobsoni (Lepidostomatidae), N=8	BOLD:ADB2995	2016-04-20	W. Mey	Indonesia	Jawa Barat	West Java	Cikaniki Stn., Mount Halimun Salak National Park	-6.749	106.535	1144
INDOBIOSYS-CCDB30314-G11	Lepidostoma jacobsoni Ulmer, 1910	adult	Lepidostomatidae	658	Lepidostoma diehli/jacobsoni (Lepidostomatidae), N=8	BOLD:ADB2995	2016-04-20	W. Mey	Indonesia	Jawa Barat	West Java	Cikaniki Stn, Mount Halimun Salak National Park, Curug Macan, LF	-6.743517	106.534817	950
INDOBIOSYS-CCDB30314-E03	Lepidostoma longipennis Weaver, 1989	adult	Lepidostomatidae	658		BOLD:ADI9377	2016-04-14	W. Mey	Indonesia	Jawa Barat	West Java	Cidahu, Mount Halimun Salak National Park, LF, Sg. Cibojang, LF Tower	-6.745733	106.713783	1100
INDOBIOSYS-CCDB26180-F06	Lepidostoma sp.	adult	Lepidostomatidae	658	Lepidostoma diehli/jacobsoni (Lepidostomatidae), N=8	BOLD:ADB2995	2015-10-18	W. Mey	Indonesia	Jawa Barat	West Java	Cikaniki Stn., Mount Halimun Salak National Park	-6.749	106.535	1144
INDOBIOSYS-CCDB26180-F08	Lepidostoma sp.	adult	Lepidostomatidae	658	Lepidostoma diehli/jacobsoni (Lepidostomatidae), N=8	BOLD:ADB2995	2015-10-18	W. Mey	Indonesia	Jawa Barat	West Java	Cikaniki Stn., Mount Halimun Salak National Park	-6.749	106.535	1144
INDOBIOSYS-CCDB26180-F09	Lepidostoma sp.	adult	Lepidostomatidae	658		BOLD:ADD0561	2015-10-18	W. Mey	Indonesia	Jawa Barat	West Java	Cikaniki Stn., Mount Halimun Salak National Park	-6.749	106.535	1144
INDOBIOSYS-CCDB30314-E08	Lepidostoma sp.	adult	Lepidostomatidae	658		BOLD:ADI7782	2016-04-13	W. Mey	Indonesia	Jawa Barat	West Java	Cidahu, Mount Halimun Salak National Park, stream within Spa area, TF	-6.742283	106.716083	1350
INDOBIOSYS-CCDB26180-A09	Adicella byblis Malicky, 1998	adult	Leptoceridae	658		BOLD:ADD1871	2015-10-18	W. Mey	Indonesia	Jawa Barat	West Java	Cikaniki Stn., Mount Halimun Salak National Park	-6.749	106.535	1144
INDOBIOSYS-CCDB30314-A11	Adicella pulcherrima Ulmer, 1906	adult	Leptoceridae	658		BOLD:ADI5762	2016-04-13	W. Mey	Indonesia	Jawa Barat	West Java	Ciapus, Mount Halimun Salak National Park, Curug Nangka TF	-6.671633	106.727033	800
INDOBIOSYS-CCDB26180-A08	Adicella sp.	adult	Leptoceridae	658		BOLD:ADB1465	2015-10-18	W. Mey	Indonesia	Jawa Barat	West Java	Cikaniki Stn., Mount Halimun Salak National Park	-6.749	106.535	1144
INDOBIOSYS-CCDB26180-A10	Adicella sp.	adult	Leptoceridae	658		BOLD:ADD1871	2015-10-18	W. Mey	Indonesia	Jawa Barat	West Java	Cikaniki Stn., Mount Halimun Salak National Park	-6.749	106.535	1144
INDOBIOSYS-CCDB30314-B10	Adicella sp.	adult	Leptoceridae	658		BOLD:ADI5762	2016-04-20	W. Mey	Indonesia	Jawa Barat	West Java	Cikaniki Stn., Mount Halimun Salak National Park	-6.749	106.535	1144
INDOBIOSYS-CCDB30314-F04	Adicella sp.	adult	Leptoceridae	658		BOLD:ADD1871	2016-04-13	W. Mey	Indonesia	Jawa Barat	West Java	Ciapus, Mount Halimun Salak National Park, Curug Nangka TF	-6.671633	106.727033	800
INDOBIOSYS-CCDB26180-D05	Oecetis kapaneus Malicky, 2005	adult	Leptoceridae	658	Oecetis kapaneus (Leptoceridae), N=2	BOLD:ADD0581	2015-10-18	W. Mey	Indonesia	Jawa Barat	West Java	Cikaniki Stn., Mount Halimun Salak National Park	-6.749	106.535	1144
INDOBIOSYS-CCDB26180-D06	Oecetis kapaneus Malicky, 2005	adult	Leptoceridae	658	Oecetis kapaneus (Leptoceridae), N=2	BOLD:ADD0581	2015-10-18	W. Mey	Indonesia	Jawa Barat	West Java	Cikaniki Stn., Mount Halimun Salak National Park	-6.749	106.535	1144
INDOBIOSYS-CCDB26180-A07	Oecetis oviformis Ulmer, 1951	adult	Leptoceridae	651		BOLD:ADD2906	2015-10-18	W. Mey	Indonesia	Jawa Barat	West Java	Cikaniki Stn., Mount Halimun Salak National Park	-6.749	106.535	1144
INDOBIOSYS-CCDB26180-B07	Oecetis sp.	adult	Leptoceridae	658		BOLD:ADD0776	2015-10-18	W. Mey	Indonesia	Jawa Barat	West Java	Cikaniki Stn., Mount Halimun Salak National Park	-6.749	106.535	1144
INDOBIOSYS-CCDB26180-C01	Oecetis sp.	adult	Leptoceridae	658		BOLD:ADD3647	2015-10-18	W. Mey	Indonesia	Jawa Barat	West Java	Cikaniki Stn., Mount Halimun Salak National Park	-6.749	106.535	1144
INDOBIOSYS-CCDB30314-D03	Oecetis sp.	adult	Leptoceridae	658		BOLD:ADD3647	2016-04-13	W. Mey	Indonesia	Jawa Barat	West Java	Cidahu, Mount Halimun Salak National Park	-6.732	106.707383	1350
INDOBIOSYS-CCDB30314-H05	Oecetis sp.	adult	Leptoceridae	658		BOLD:ADJ0538	2016-04-13	W. Mey	Indonesia	Jawa Barat	West Java	Cidahu, Mount Halimun Salak National Park, Sg. Citrasamala	-6.73065	106.706667	1400
INDOBIOSYS-CCDB26180-C05	Oecetis tripunctata Fabricius, 1793	adult	Leptoceridae	658		BOLD:ADB3102	2015-10-18	W. Mey	Indonesia	Jawa Barat	West Java	Cikaniki Stn., Mount Halimun Salak National Park	-6.749	106.535	1144
INDOBIOSYS-CCDB26180-C06	Oecetis tripunctata Fabricius, 1793	adult	Leptoceridae	658		BOLD:ADB3102	2015-10-18	W. Mey	Indonesia	Jawa Barat	West Java	Cikaniki Stn., Mount Halimun Salak National Park	-6.749	106.535	1144
INDOBIOSYS-CCDB26180-C07	Oecetis tripunctata Fabricius, 1793	adult	Leptoceridae	658		BOLD:ADB3102	2015-10-18	W. Mey	Indonesia	Jawa Barat	West Java	Cikaniki Stn., Mount Halimun Salak National Park	-6.749	106.535	1144
INDOBIOSYS-CCDB26180-E04	Oecetis tripunctata Fabricius, 1793	adult	Leptoceridae	658		BOLD:ADB3102	2015-10-18	W. Mey	Indonesia	Jawa Barat	West Java	Cikaniki Stn., Mount Halimun Salak National Park	-6.749	106.535	1144
INDOBIOSYS-CCDB30314-H06	Setodes larentia Malicky & Chantaramongkol, 2006	adult	Leptoceridae	658		BOLD:ADJ2411	2016-04-13	W. Mey	Indonesia	Jawa Barat	West Java	Cidahu, Mount Halimun Salak National Park, Sg. Citrasamala	-6.73065	106.706667	1400
INDOBIOSYS-CCDB30314-D06	Setodes musagetes Malicky & Chantaramongkol, 2006	adult	Leptoceridae	658	Trichosetodes handschini/Setodes musagetes (Leptoceridae) , N=6	BOLD:ADB3100	2016-04-20	W. Mey	Indonesia	Jawa Barat	West Java	Cikaniki Stn, Mount Halimun Salak National Park, right tributary Nr. 1 to Cikaniki River	-6.748117	106.539533	1350
INDOBIOSYS-CCDB30314-F02	Setodes musagetes Malicky & Chantaramongkol, 2006	adult	Leptoceridae	658	Trichosetodes handschini/Setodes musagetes (Leptoceridae) , N=6	BOLD:ADB3100	2016-04-14	W. Mey	Indonesia	Jawa Barat	West Java	Cidahu, Mount Halimun Salak National Park, LF, Sg. Cibojang, LF Tower	-6.745733	106.713783	1100
INDOBIOSYS-CCDB26179-G10	Setodes sp.	adult	Leptoceridae	658		BOLD:ADB1486	2015-10-18	W. Mey	Indonesia	Jawa Barat	West Java	Cikaniki Stn., Mount Halimun Salak National Park	-6.749	106.535	1144
INDOBIOSYS-CCDB26179-G11	Setodes sp.	adult	Leptoceridae	658		BOLD:ADB1486	2015-10-18	W. Mey	Indonesia	Jawa Barat	West Java	Cikaniki Stn., Mount Halimun Salak National Park	-6.749	106.535	1144
INDOBIOSYS-CCDB26180-D01	Tagalopsyche brunnea Ulmer, 1905	adult	Leptoceridae	658	Tagalopsyche brunnea (Leptoceridae), N=3	BOLD:ADD2581	2015-10-18	W. Mey	Indonesia	Jawa Barat	West Java	Cikaniki Stn., Mount Halimun Salak National Park	-6.749	106.535	1144
INDOBIOSYS-CCDB26180-D04	Tagalopsyche brunnea Ulmer, 1905	adult	Leptoceridae	631	Tagalopsyche brunnea (Leptoceridae), N=3	BOLD:ADD2581	2015-10-18	W. Mey	Indonesia	Jawa Barat	West Java	Cikaniki Stn., Mount Halimun Salak National Park	-6.749	106.535	1144
INDOBIOSYS-CCDB26180-D12	Tagalopsyche brunnea Ulmer, 1905	adult	Leptoceridae	658	Tagalopsyche brunnea (Leptoceridae), N=3	BOLD:ADD2581	2015-10-18	W. Mey	Indonesia	Jawa Barat	West Java	Cikaniki Stn., Mount Halimun Salak National Park	-6.749	106.535	1144
INDOBIOSYS-CCDB26178-G04	Trichosetodes handschini Ulmer, 1951	adult	Leptoceridae	628	Trichosetodes handschini (Leptoceridae), N=2	BOLD:AAM8125	2015-10-18	W. Mey	Indonesia	Jawa Barat	West Java	Cikaniki Stn., Mount Halimun Salak National Park	-6.749	106.535	1144
INDOBIOSYS-CCDB26178-G05	Trichosetodes handschini Ulmer, 1951	adult	Leptoceridae	655	Trichosetodes handschini (Leptoceridae), N=2	BOLD:AAM8125	2015-10-18	W. Mey	Indonesia	Jawa Barat	West Java	Cikaniki Stn., Mount Halimun Salak National Park	-6.749	106.535	1144
INDOBIOSYS-CCDB26179-G09	Trichosetodes handschini Ulmer, 1951	adult	Leptoceridae	658	Trichosetodes handschini/Setodes musagetes (Leptoceridae) , N=6	BOLD:ADB3100	2015-10-18	W. Mey	Indonesia	Jawa Barat	West Java	Cikaniki Stn., Mount Halimun Salak National Park	-6.749	106.535	1144
INDOBIOSYS-CCDB26180-B06	Triplectides indicus Walker, 1852	adult	Leptoceridae	440			2015-10-18	W. Mey	Indonesia	Jawa Barat	West Java	Cikaniki Stn., Mount Halimun Salak National Park	-6.749	106.535	1144
INDOBIOSYS-CCDB30314-H08	Gunugiella sp.	adult	Philopotamidae	658		BOLD:ADJ0164	2016-04-13	W. Mey	Indonesia	Jawa Barat	West Java	Cidahu, Mount Halimun Salak National Park, Sg. Citrasamala	-6.73065	106.706667	1400
INDOBIOSYS-CCDB26178-F10	Chimarra briseis Malicky, 1998	adult	Philopotamidae	544	Chimarra briseis (Philopotamidae), N=7	BOLD:ADB1552	2015-10-18	W. Mey	Indonesia	Jawa Barat	West Java	Cikaniki Stn., Mount Halimun Salak National Park	-6.749	106.535	1144
INDOBIOSYS-CCDB26178-F12	Chimarra briseis Malicky, 1998	adult	Philopotamidae	658	Chimarra briseis (Philopotamidae), N=7	BOLD:ADB1552	2015-10-18	W. Mey	Indonesia	Jawa Barat	West Java	Cikaniki Stn., Mount Halimun Salak National Park	-6.749	106.535	1144
INDOBIOSYS-CCDB26178-G01	Chimarra briseis Malicky, 1998	adult	Philopotamidae	658	Chimarra briseis (Philopotamidae), N=7	BOLD:ADB1552	2015-10-18	W. Mey	Indonesia	Jawa Barat	West Java	Cikaniki Stn., Mount Halimun Salak National Park	-6.749	106.535	1144
INDOBIOSYS-CCDB26178-F07	Chimarra sp.	adult	Philopotamidae	658		BOLD:ADB1273	2015-10-18	W. Mey	Indonesia	Jawa Barat	West Java	Cikaniki Stn., Mount Halimun Salak National Park	-6.749	106.535	1144
INDOBIOSYS-CCDB26178-F08	Chimarra sp.	adult	Philopotamidae	658		BOLD:ADD1802	2015-10-18	W. Mey	Indonesia	Jawa Barat	West Java	Cikaniki Stn., Mount Halimun Salak National Park	-6.749	106.535	1144
INDOBIOSYS-CCDB30314-G12	Chimarra sp.	adult	Philopotamidae	658	Chimarra briseis (Philopotamidae), N=7	BOLD:ADB1552	2016-04-13	W. Mey	Indonesia	Jawa Barat	West Java	Cidahu, Mount Halimun Salak National Park, Sg. Citrasamala	-6.73065	106.706667	1400
INDOBIOSYS-CCDB30314-H09	Chimarra sp., cf. aram	adult	Philopotamidae	658		BOLD:ADI8564	2016-04-13	W. Mey	Indonesia	Jawa Barat	West Java	Cidahu, Mount Halimun Salak National Park, stream within Spa area, TF	-6.742283	106.716083	1350
INDOBIOSYS-CCDB30314-B05	Potamyia sp.	adult	Hydropsychidae	658		BOLD:ABA2418	2016-04-20	W. Mey	Indonesia	Jawa Barat	West Java	Cikaniki Stn., Mount Halimun Salak National Park	-6.749	106.535	1144
INDOBIOSYS-CCDB26178-D09	Lype atnia Malicky & Chantaramongkol, 1993	adult	Psychomyiidae	658		BOLD:ADD3975	2015-10-18	W. Mey	Indonesia	Jawa Barat	West Java	Cikaniki Stn., Mount Halimun Salak National Park	-6.749	106.535	1144
INDOBIOSYS-CCDB26178-D11	Lype atnia Malicky & Chantaramongkol, 1993	adult	Psychomyiidae	658		BOLD:ADD0721	2015-10-18	W. Mey	Indonesia	Jawa Barat	West Java	Cikaniki Stn., Mount Halimun Salak National Park	-6.749	106.535	1144
INDOBIOSYS-CCDB30314-B11	Paduniella sp.	adult	Psychomyiidae	658		BOLD:ADI9135	2016-04-20	W. Mey	Indonesia	Jawa Barat	West Java	Cikaniki Stn., Mount Halimun Salak National Park, Canopy trail, LF	-6.749	106.535	1050
INDOBIOSYS-CCDB26178-E03	Psychomyia capillata Ulmer, 1910	adult	Psychomyiidae	613	Psychomyia capillata (Psychomyiidae), N=3	BOLD:AAX7428	2015-10-18	W. Mey	Indonesia	Jawa Barat	West Java	Cikaniki Stn., Mount Halimun Salak National Park	-6.749	106.535	1144
INDOBIOSYS-CCDB26178-E04	Psychomyia capillata Ulmer, 1910	adult	Psychomyiidae	658	Psychomyia capillata (Psychomyiidae), N=3	BOLD:AAX7428	2015-10-18	W. Mey	Indonesia	Jawa Barat	West Java	Cikaniki Stn., Mount Halimun Salak National Park	-6.749	106.535	1144
INDOBIOSYS-CCDB30314-D12	Psychomyia sp.	adult	Psychomyiidae	658	Psychomyia capillata (Psychomyiidae), N=3		2016-04-20	W. Mey	Indonesia	Jawa Barat	West Java	Cikaniki Stn., Mount Halimun Salak National Park	-6.749	106.535	1350
INDOBIOSYS-CCDB26178-D12	Tinodes sp.	adult	Psychomyiidae	658	Tinodes sp. (Psychomyiidae), N=2	BOLD:ADD3382	2015-10-18	W. Mey	Indonesia	Jawa Barat	West Java	Cikaniki Stn., Mount Halimun Salak National Park	-6.749	106.535	1144
INDOBIOSYS-CCDB26178-E01	Tinodes sp.	adult	Psychomyiidae	658		BOLD:ADD3810	2015-10-18	W. Mey	Indonesia	Jawa Barat	West Java	Cikaniki Stn., Mount Halimun Salak National Park	-6.749	106.535	1144
INDOBIOSYS-CCDB26178-E08	Tinodes sp.	adult	Psychomyiidae	641	Tinodes sp. (Psychomyiidae), N=2	BOLD:ADD3382	2015-10-18	W. Mey	Indonesia	Jawa Barat	West Java	Cikaniki Stn., Mount Halimun Salak National Park	-6.749	106.535	1144
INDOBIOSYS-CCDB30314-D07	Tinodes sp.	adult	Psychomyiidae	658		BOLD:ABA3831	2016-04-20	W. Mey	Indonesia	Jawa Barat	West Java	Cikaniki Stn., Mount Halimun Salak National Park, right tributary Nr. 1 to Cikaniki River	-6.748117	106.539533	1350
INDOBIOSYS-CCDB26178-E09	Tinodes sp.nov.	adult	Psychomyiidae	363			2015-10-18	W. Mey	Indonesia	Jawa Barat	West Java	Cikaniki Stn., Mount Halimun Salak National Park	-6.749	106.535	1144
INDOBIOSYS-CCDB30314-E06	Rhyacophila sp.	adult	Rhyacophilidae	658		BOLD:ADJ4415	2016-04-14	W. Mey	Indonesia	Jawa Barat	West Java	Cidahu, Mount Halimun Salak National Park, LF, Sg. Cibojang, LF Tower	-6.745733	106.713783	1100
INDOBIOSYS-CCDB30314-F09	Drepanocentron sp.	adult	Xiphocentronidae	658		BOLD:ADD3976	2016-04-13	W. Mey	Indonesia	Jawa Barat	West Java	Ciapus, Mount Halimun Salak National Park, Curug Nangka TF	-6.671633	106.727033	800
INDOBIOSYS-CCDB30314-H01	Drepanocentron sp.	adult	Xiphocentronidae	658	Drepanocentron sp. (Xiphocentronidae), N=3	BOLD:ADJ3624	2016-04-13	W. Mey	Indonesia	Jawa Barat	West Java	Cidahu, Mount Halimun Salak National Park, Sg. Citrasamala	-6.73065	106.706667	1400
INDOBIOSYS-CCDB30314-H02	Drepanocentron sp.	adult	Xiphocentronidae	658		BOLD:ADD0720	2016-04-13	W. Mey	Indonesia	Jawa Barat	West Java	Cidahu, Mount Halimun Salak National Park, small streams above Spa, TF	-6.742317	106.716133	1350
INDOBIOSYS-CCDB26178-D03	Drepanocentron sp.1	adult	Xiphocentronidae	569	Drepanocentron sp. (Xiphocentronidae), N=3	BOLD:ADD0720	2015-10-18	W. Mey	Indonesia	Jawa Barat	West Java	Cikaniki Stn., Mount Halimun Salak National Park	-6.749	106.535	1144
INDOBIOSYS-CCDB26178-F11	Drepanocentron sp.1	adult	Xiphocentronidae	658	Drepanocentron sp. (Xiphocentronidae), N=3	BOLD:ADD0720	2015-10-18	W. Mey	Indonesia	Jawa Barat	West Java	Cikaniki Stn., Mount Halimun Salak National Park	-6.749	106.535	1144
INDOBIOSYS-CCDB26178-D07	Drepanocentron sp.2	adult	Xiphocentronidae	658		BOLD:ADD3976	2015-10-18	W. Mey	Indonesia	Jawa Barat	West Java	Cikaniki Stn., Mount Halimun Salak National Park	-6.749	106.535	1144

## Sheet: Tabelle2
-6.84926	106.515
-6.84926	106.515
-6.84926	106.515
-6.81725	106.503
-6.81725	106.503
-6.81725	106.503
-6.74617	106.54
-6.74372	106.536
-6.74372	106.536
-6.75073	106.725
-6.74617	106.54
-6.74617	106.54
-6.74617	106.54
-6.74617	106.54
-6.74617	106.54
-6.74617	106.54
-6.74617	106.54
-6.71885	106.521
-6.71885	106.521
-6.84926	106.515
-6.84926	106.515
-6.81725	106.503
-6.81725	106.503
-7.14078	106.63
-7.14078	106.63
-7.14521	106.64
-7.14521	106.64
-7.14521	106.64
-7.14521	106.64
-6.75073	106.725
-6.73832	106.715
-6.73832	106.715
-6.73815	106.715
-6.60344	106.707
-6.60344	106.707
-6.74372	106.536
-6.74372	106.536
-6.74372	106.536
-6.74372	106.536
-6.74372	106.536
-7.14078	106.63
-7.14521	106.64
-6.74617	106.54
-6.74617	106.54
-6.84926	106.515
-6.73832	106.715
-6.74372	106.536
-6.74372	106.536
-6.73832	106.715
-6.73832	106.715
-6.84926	106.526
-6.74617	106.54
-6.84926	106.515
-6.81725	106.503
-6.84926	106.515
-6.84926	106.515
-6.74372	106.536
-7.14521	106.64
-6.74617	106.54
-6.73815	106.715
-6.74372	106.536
-6.74372	106.536
-6.74617	106.54
-6.84926	106.515
-6.75073	106.725
-6.74372	106.536
-6.74372	106.536
-6.74372	106.536
-6.74372	106.536
-6.81725	106.503
-6.73832	106.715
-6.73832	106.715
-6.73832	106.715
-6.73815	106.715
-6.73815	106.715
-6.81725	106.503
-6.84926	106.515
-7.234	106.614
-6.749	106.535
-6.748117	106.539533
-6732	106.707383
-6.73065	106.706667
-6.745733	106.713783
-6.74917	106.542
-6.74352	106.535
-6.74352	106.535
-6.749	106.535
-6.749	106.535
-6.749	106.535
-6.749	106.535
-6.749	106.535
-6.749	106.535
-6.67163	106.727
-6.74352	106.535
-6.749	106.535
-6.749	106.535
-6.749	106.535
-6.74812	106.54
-6.74573	106.714
-6.749	106.535
-6.74573	106.714
-6.749	106.535
-6.749	106.535
-6.749	106.535
-6.749	106.535
-6.67163	106.727
-6.74352	106.535
-6.749	106.535
-6.749	106.535
-6.749	106.535
-6.6016	106.803
-6.67163	106.727
-6.73065	106.707
-6.749	106.535
-6.74352	106.535
-6.74573	106.714
-6.749	106.535
-6.749	106.535
-6.749	106.535
-6.74228	106.716
-6.749	106.535
-6.67163	106.727
-6.749	106.535
-6.749	106.535
-6.749	106.535
-6.67163	106.727
-6.749	106.535
-6.749	106.535
-6.749	106.535
-6.749	106.535
-6.749	106.535
-6.732	106.707
-6.73065	106.707
-6.749	106.535
-6.749	106.535
-6.749	106.535
-6.749	106.535
-6.73065	106.707
-6.74812	106.54
-6.74573	106.714
-6.749	106.535
-6.749	106.535
-6.749	106.535
-6.749	106.535
-6.749	106.535
-6.749	106.535
-6.749	106.535
-6.749	106.535
-6.749	106.535
-6.73065	106.707
-6.749	106.535
-6.749	106.535
-6.749	106.535
-6.749	106.535
-6.749	106.535
-6.73065	106.707
-6.74228	106.716
-6.749	106.535
-6.749	106.535
-6.749	106.535
-6.749	106.535
-6.749	106.535
-6.749	106.535
-6.749	106.535
-6.749	106.535
-6.74812	106.54
-6.749	106.535
-6.74573	106.713783
-6.67163	106.727033
-6.73065	106.706667
-6.742317	106.716133
-6.749	106.535
-6.749	106.535
-6.749	106.535
